# Supplementary material
Source: publisher figshare collection journal article supplement (https://geolsoc.figshare.com/ndownloader/files/5425571)
Supplement: Supplementary file 1 [file 5425571]

Table 1. U-Pb zircon ion-microprobe data,,,,,,,,,,,,,,
spot1,f206%2,238U,±s3,207Pb,±s3,207Pb,±s3,206Pb,"±s3, 4",[U],[Th],[Pb],Th/U,
,,206Pb,,206Pb,,206Pb,,238U,,ppm,ppm,ppm,meas,
"R.1309.4.  Volcanic unit within flora-bearing horizons, Botany Bay Group, Botany Bay (63.67°S, 57.87°W)",,,,,,,,,,,,,,
18c,0.50,38.936,0.501,0.0493,0.0010,164,44,163,2,328,122,10,0.37,
14c,0.30,38.705,0.550,0.0483,0.0020,112,93,164,2,108,46,3,0.42,
7c,0.43,38.699,0.509,0.0516,0.0012,267,54,164,2,206,85,6,0.41,
11c,0.64*,38.681,0.528,0.0477,0.0016,84,78,165,2,272,163,9,0.60,
6c,0.54*,38.414,0.525,0.0486,0.0014,129,66,166,2,329,111,10,0.34,
4c,3*,38.337,0.515,0.0489,0.0027,141,126,166,2,363,169,11,0.47,
13c,0.37*,38.316,0.536,0.0512,0.0009,250,38,166,2,466,188,14,0.40,
12c,0.35*,38.052,0.493,0.0497,0.0010,183,48,167,2,665,596,23,0.90,
16c,1.00,37.831,0.530,0.0497,0.0017,182,78,168,2,130,95,4,0.73,
3c,0.16,37.803,0.488,0.0495,0.0006,171,26,168,2,946,885,34,0.93,
9c,0.35,37.762,0.491,0.0508,0.0008,233,37,168,2,545,180,17,0.33,
15c,5.63*,37.601,0.515,0.0483,0.0047,112,213,169,2,2049,731,63,0.36,
10c,0.22*,37.516,0.482,0.0490,0.0006,150,30,170,2,1034,1107,38,1.07,
8c,0.16,37.494,0.512,0.0493,0.0008,162,38,170,2,419,159,13,0.38,
17c,1.37*,37.414,0.506,0.0422,0.0025,-215,143,170,2,213,107,7,0.50,
2,1.46*,7.716,0.115,0.0707,0.0008,950,23,786,11,478,21,67,0.04,
5,0.02,5.393,0.069,0.0751,0.0005,1070,12,1097,13,318,180,74,0.57,
"D.9125.5. Basal Botany Bay Group, Tower Hill. (64.46°S, 58.97°W)",,,,,,,,,,,,,,
1.1c,0.02,37.245,0.446,0.0496,0.0008,179,37,171,2,999,218,,0.22,
6.1c,<0.01,36.976,0.452,0.0484,0.0008,121,42,172,2,834,210,,0.25,
7.1c,0.10,37.887,0.511,0.0502,0.0012,204,55,168,2,528,125,,0.24,
18.1,0.10,39.921,0.584,0.0500,0.0013,197,61,159,2,548,257,,0.47,
16.1c,0.04,37.698,0.521,0.0497,0.0012,182,59,169,2,519,159,,0.31,
8.1c,0.04,37.720,0.534,0.0498,0.0012,184,56,169,2,485,154,,0.32,
12.1c,<0.01,37.378,0.539,0.0475,0.0013,74,68,170,2,370,127,,0.34,
4.1c,0.20,38.441,0.572,0.0510,0.0013,241,59,166,2,396,150,,0.38,
5.1,0.32,38.019,0.560,0.0520,0.0015,285,66,167,2,317,241,,0.76,
14.1,0.32,38.069,0.583,0.0519,0.0016,283,71,167,2,324,127,,0.39,
10.1c,0.25,38.830,0.628,0.0513,0.0017,254,80,164,3,241,99,,0.41
2.1c,<0.01,37.065,0.581,0.0482,0.0016,111,80,172,3,239,89,,0.37
13.1c,<0.01,37.042,0.658,0.0493,0.0018,164,87,172,3,262,77,,0.29
17.1,0.69,38.534,0.804,0.0549,0.0027,407,112,165,3,127,69,,0.55
3.1,0.14,22.990,0.316,0.0529,0.0012,324,51,274,4,302,83,,0.27
11.1,0.46,38.237,0.879,0.0531,0.0017,332,76,166,4,253,74,,0.29
15.1,0.18,18.509,0.218,0.0547,0.0007,399,28,339,4,893,98,,0.11
9.1c,0.20,37.301,0.989,0.0510,0.0022,242,102,171,4,171,49,,0.29
,,,,,,,,,,,,,
"1.  Spot identification number, c indicates analysis used in calculation of concordia age and plotted in Fig. concordia.",,,,,,,,,,,,,
2.  Percentage of 206Pb contributed by common Pb. *indicates that a common Pb correction was performed for that analysis.,,,,,,,,,,,,,
3.  All errors quoted in this table are 1s and include propagated errors of the standard measurements.  ,,,,,,,,,,,,,
4.  Data are presented in order of increasing 206Pb/238U age for each sample.,,,,,,,,,,,,,
